# Supplementary material for: Phenylalanine Increases the Production of Antioxidant Phenolic Acids in Ginkgo biloba Cell Cultures
Source: MDPI journal article supplement (doi:10.3390/molecules26164965), 2021-08-17
Supplement: s1 [file s1]

## Supplementary files

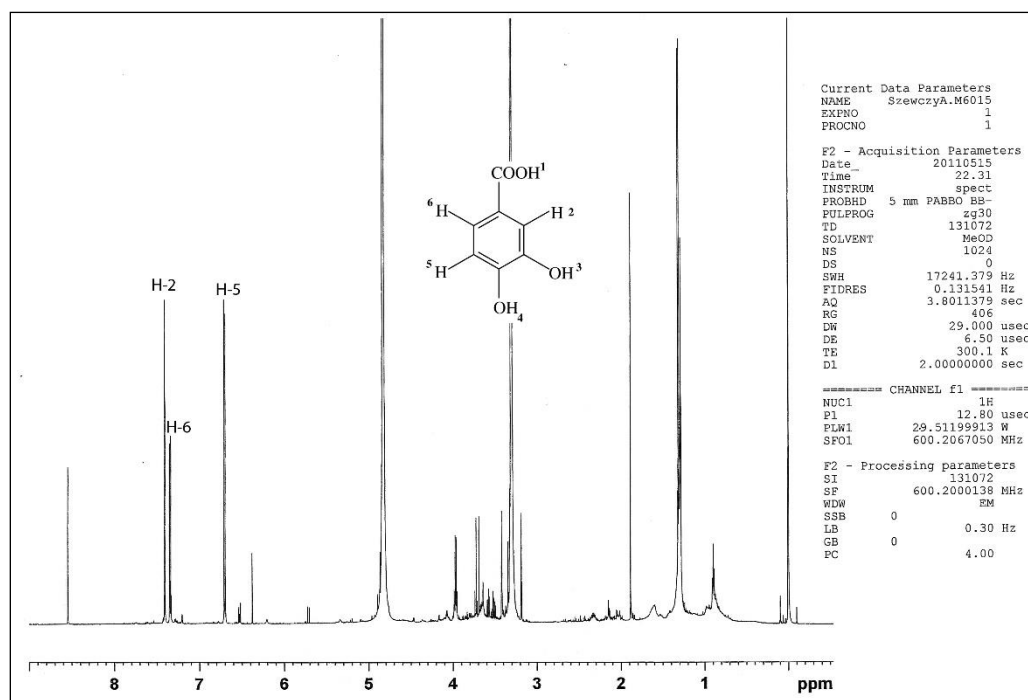

**Figure S1**  $^1\text{H}$ NMR spectrum of compound 1 (protocatechuic acid)

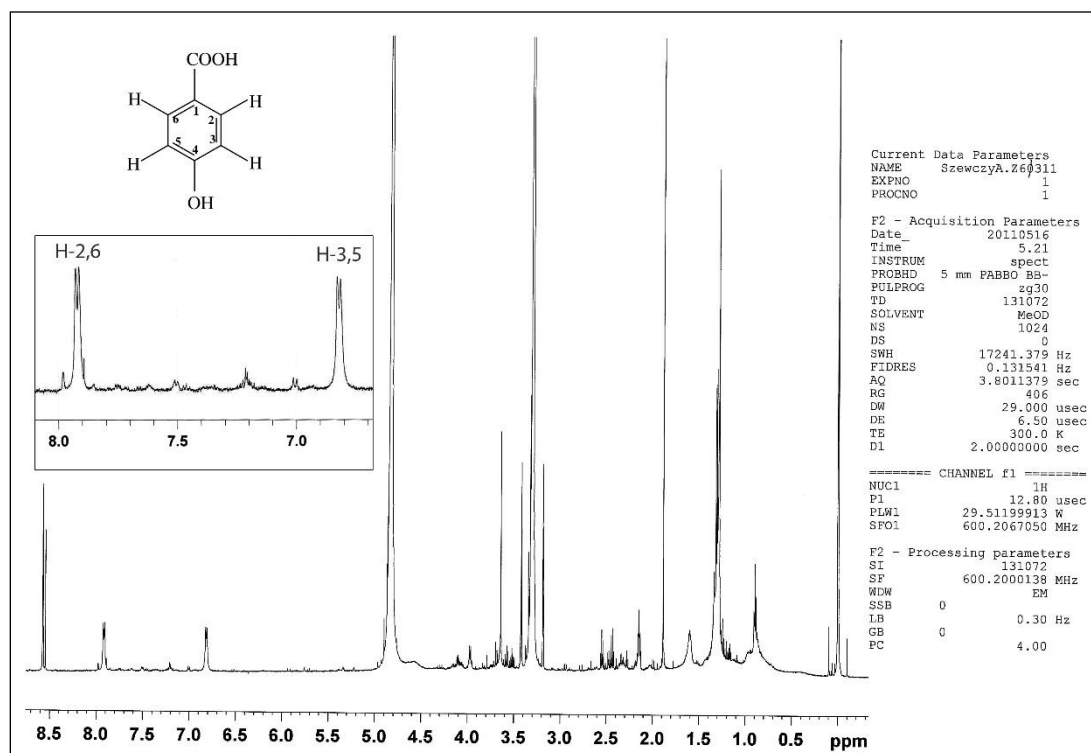

**Figure S2**  $^1\text{H}$ NMR spectrum of compound 2 (*p*-hydroxybenzoic acid)

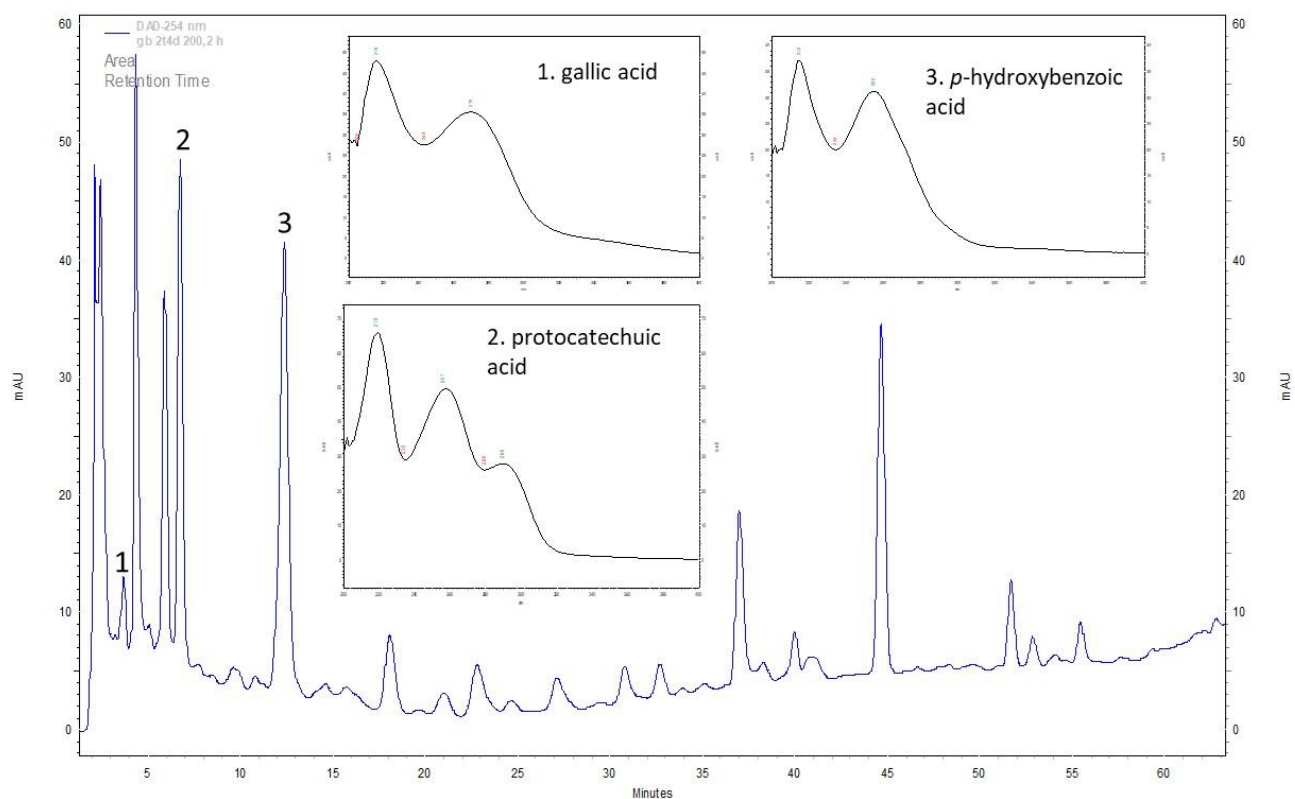

**Figure S3** Sample chromatogram and UV spectra of the extract from *Ginkgo biloba* cell cultures (4 days after addition of 200 mg of phenylalanine, week 2).

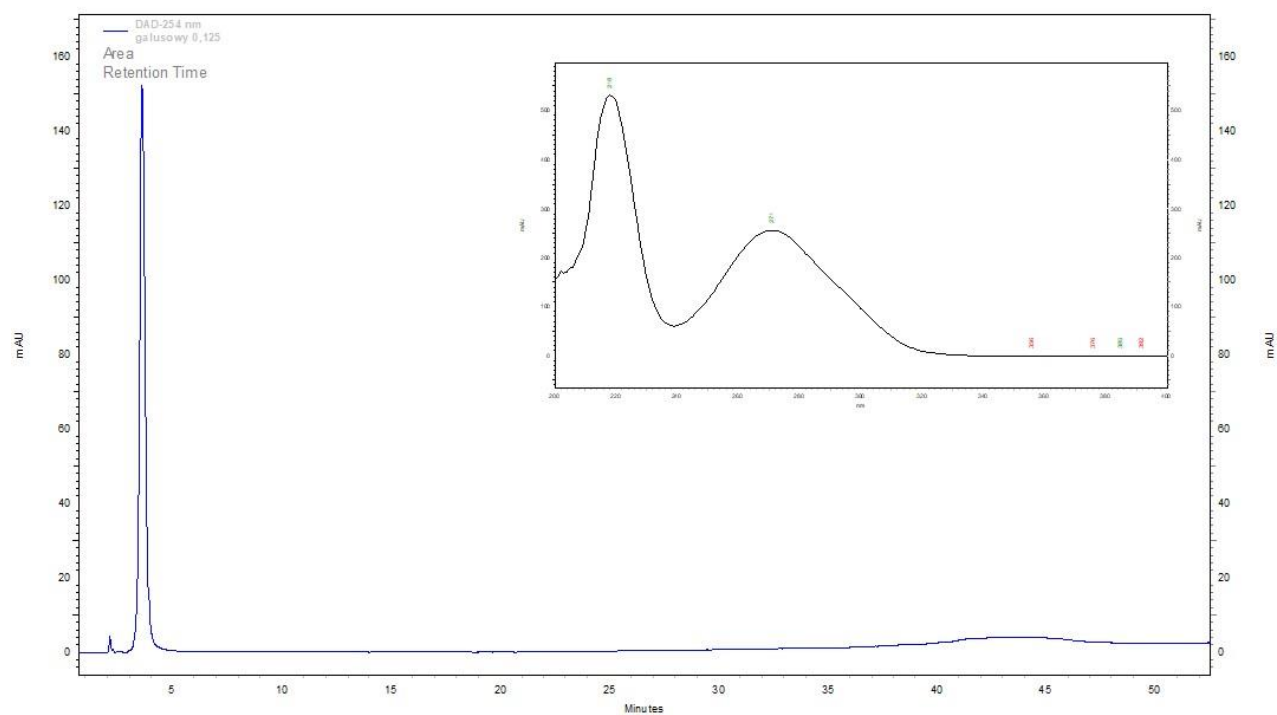

**Figure S4** Chromatogram and UV spectrum of gallic acid.

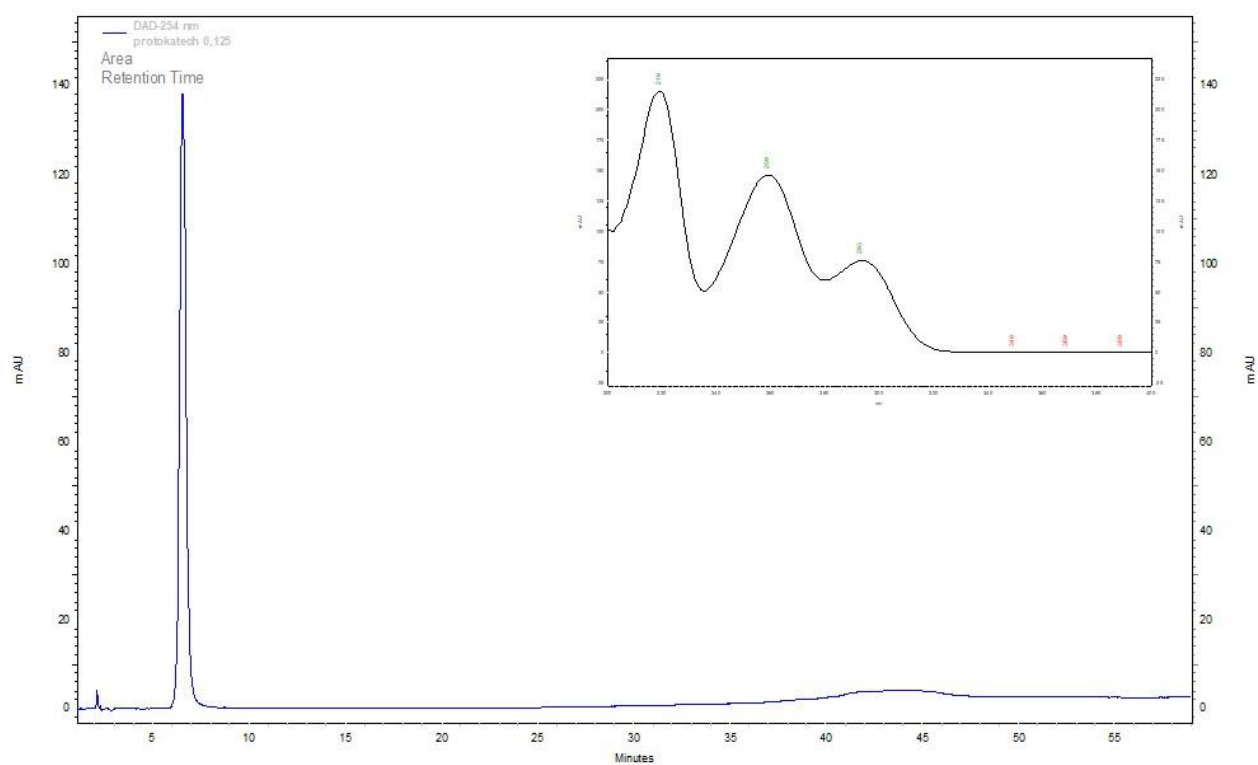

**Figure S5** Chromatogram and UV spectrum of protocatechuic acid.

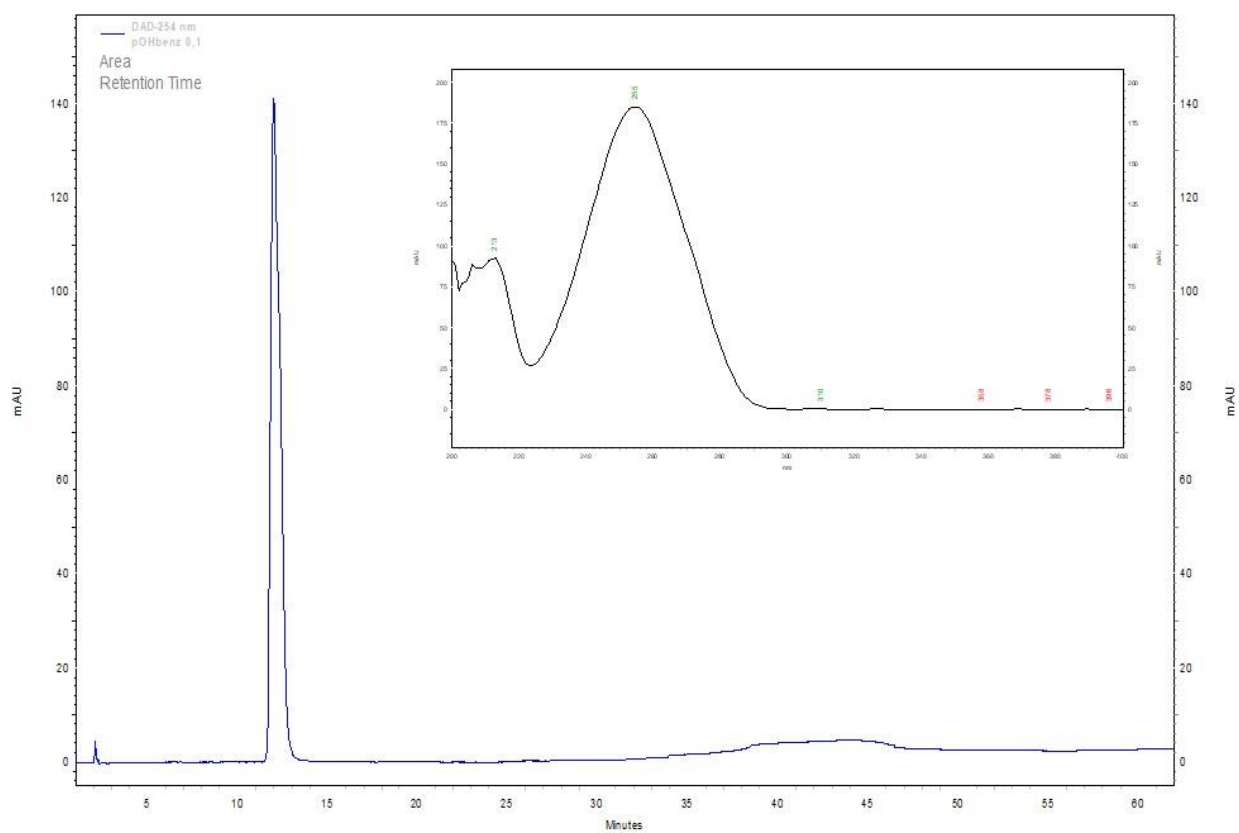

**Figure S6** Chromatogram and UV spectrum of *p*-hydroxybenzoic acid.

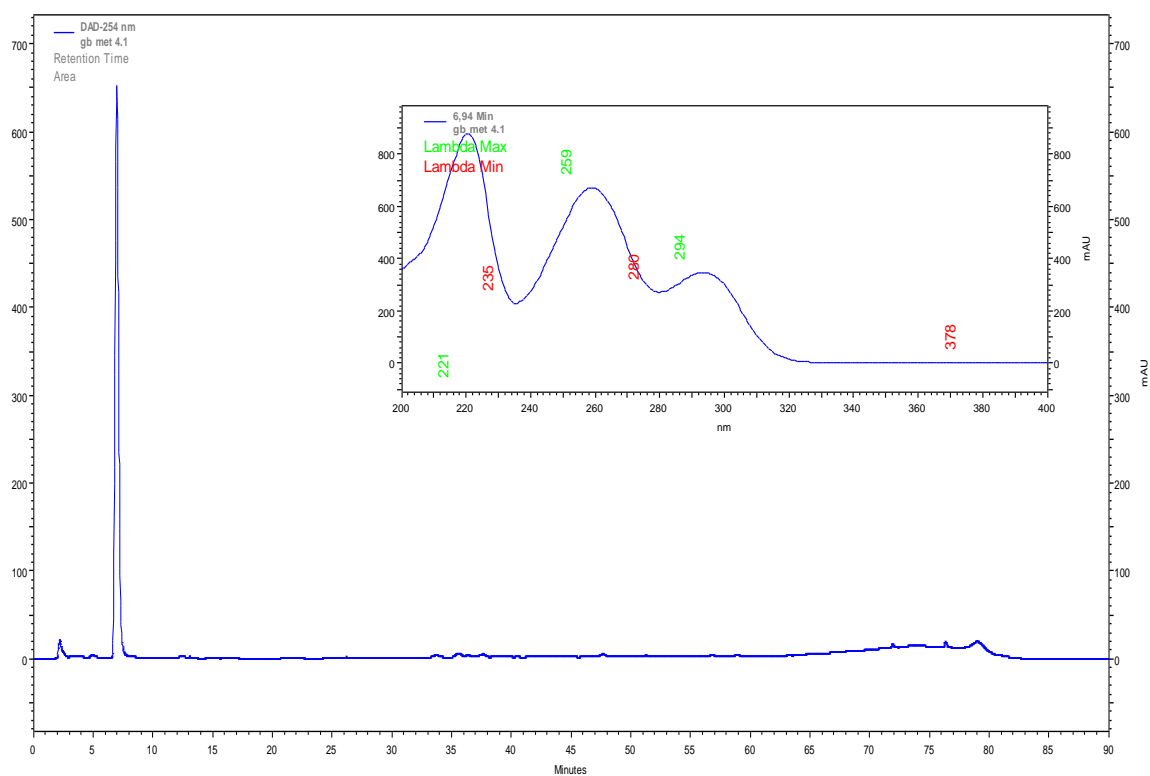

**Figure S7** Chromatogram and UV spectrum of compound 1 (protocatechuic acid)

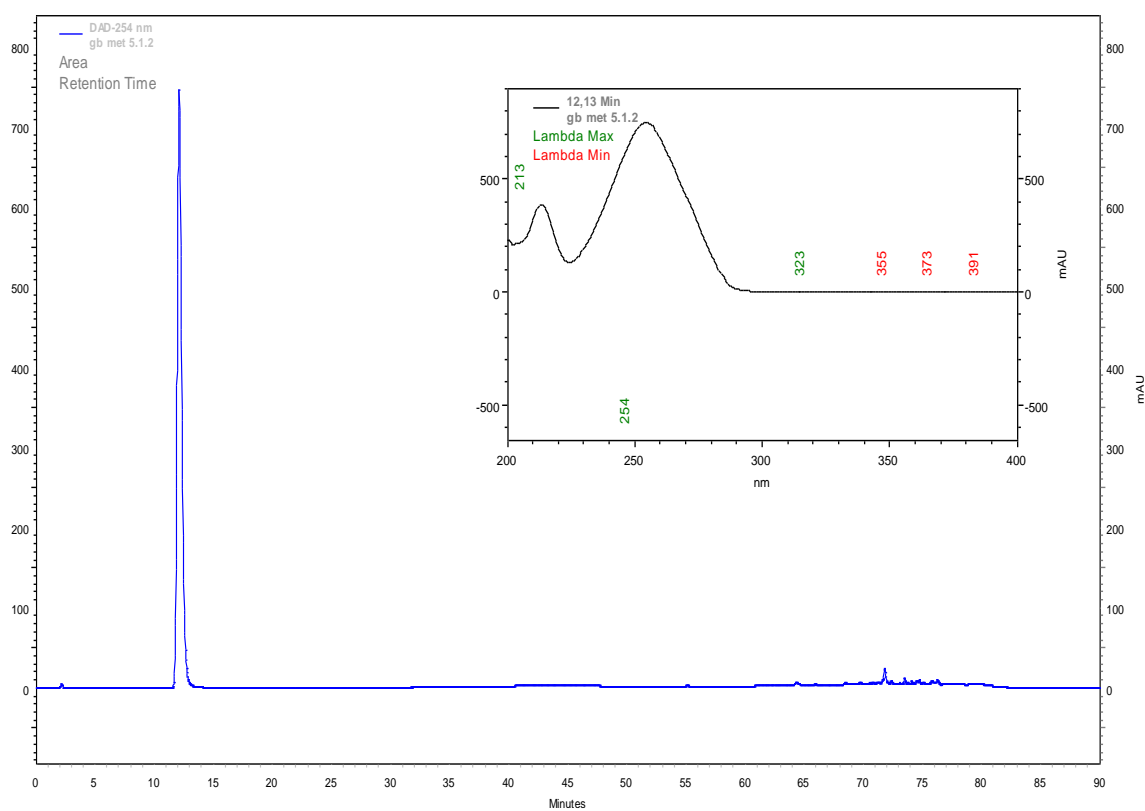

**Figure S8** Chromatogram and UV spectrum of compound 2 (*p*-hydroxybenzoic acid)
